# Supplementary material
Source: PubMed Central journal article supplement (PMC5446058)
Supplement: NIHMS856756-supplement-Supplemental_Information.pdf [file NIHMS856756-supplement-Supplemental_Information.pdf]

## Supporting Information

# High-Resolution Live-Cell Imaging and Analysis by Laser Desorption/Ionization Droplet Delivery Mass Spectrometry

*Jae Kyoo Lee,<sup>1</sup> Erik T. Jansson,<sup>1,2</sup> Hong Gil Nam,<sup>3,4,\*</sup> Richard N. Zare<sup>1,\*</sup>*

<sup>1</sup>Department of Chemistry, Stanford University, Stanford, California, 94305 USA

<sup>2</sup>Department of Chemistry – BMC, Uppsala University, SE-75124 Uppsala, Sweden

<sup>3</sup>Center for Plant Aging Research, Institute for Basic Science, Daegu 711-873, Republic of Korea

<sup>4</sup>Department of New Biology, DGIST, Daegu 711-873, Republic of Korea

\*To whom correspondence should be addressed:

Prof. Richard N. Zare  
Department of Chemistry  
Stanford University  
333 Campus Drive  
Stanford, CA 94305-5080, USA  
Tel: +1-650-723-3062  
Email: [zare@stanford.edu](mailto:zare@stanford.edu)

Prof. Hong Gil Nam  
Department of New Biology  
DGIST, Daegu 711-873, Republic of Korea  
Tel: +82-53-785-1800  
Email: [nam@dgist.ac.kr](mailto:nam@dgist.ac.kr)

## **Validation of analyte identities secreted from PC12 cells with LC-MS MRM**

LC-MS analyses with MRM of the biological and control samples were performed on an Agilent 1100 LC (Agilent, Santa Clara, CA) equipped with an Eclipse Plus 5  $\mu\text{m}$  phenyl-hexyl column, 100  $\text{\AA}$  pore size, 150 mm x 2.1 mm (Agilent, Santa Clara, CA) and coupled to an ESI Quattro Premier triple quadrupole MS (Waters, Milford, MA). Separation of the analytes was performed by injection of 10  $\mu\text{L}$  of sample solution. A binary solvent system was used on the LC, with buffer A ( $\text{H}_2\text{O}$  with 0.1% formic acid) and buffer B (acetonitrile with 0.1% formic acid). The column temperature was kept at 25°C. A 250  $\mu\text{L}/\text{min}$  flow rate was used with gradient elution where buffer B increased linearly over the course of a 10-minute run as follows: 0–2 min 0% B, 2–5 min 0–25% B, 5–6 min 25–70% B, 6–7 min 70% B, 7–8 min 70–0%B, 8–10 min 0% B. MS parameters used for MRM were: capillary voltage 5 kV, source temperature 110°C, desolvation temperature 350°C. Cone voltage was parent-ion dependent and collision energy was daughter-ion dependent. For phenethylamine ( $m/z$  122), the cone voltage was set to 18 V; collision energy 25 eV (to  $m/z$  76.8), 19 eV (to  $m/z$  78.7), 21 eV (to  $m/z$  102.7) and 12 eV (to  $m/z$  104.8). For tyramine ( $m/z$  138), the cone voltage was set to 15 V; 25 eV (to  $m/z$  76.7) and 9 eV (to  $m/z$  120.8). Dwell times were 50 ms per transition.

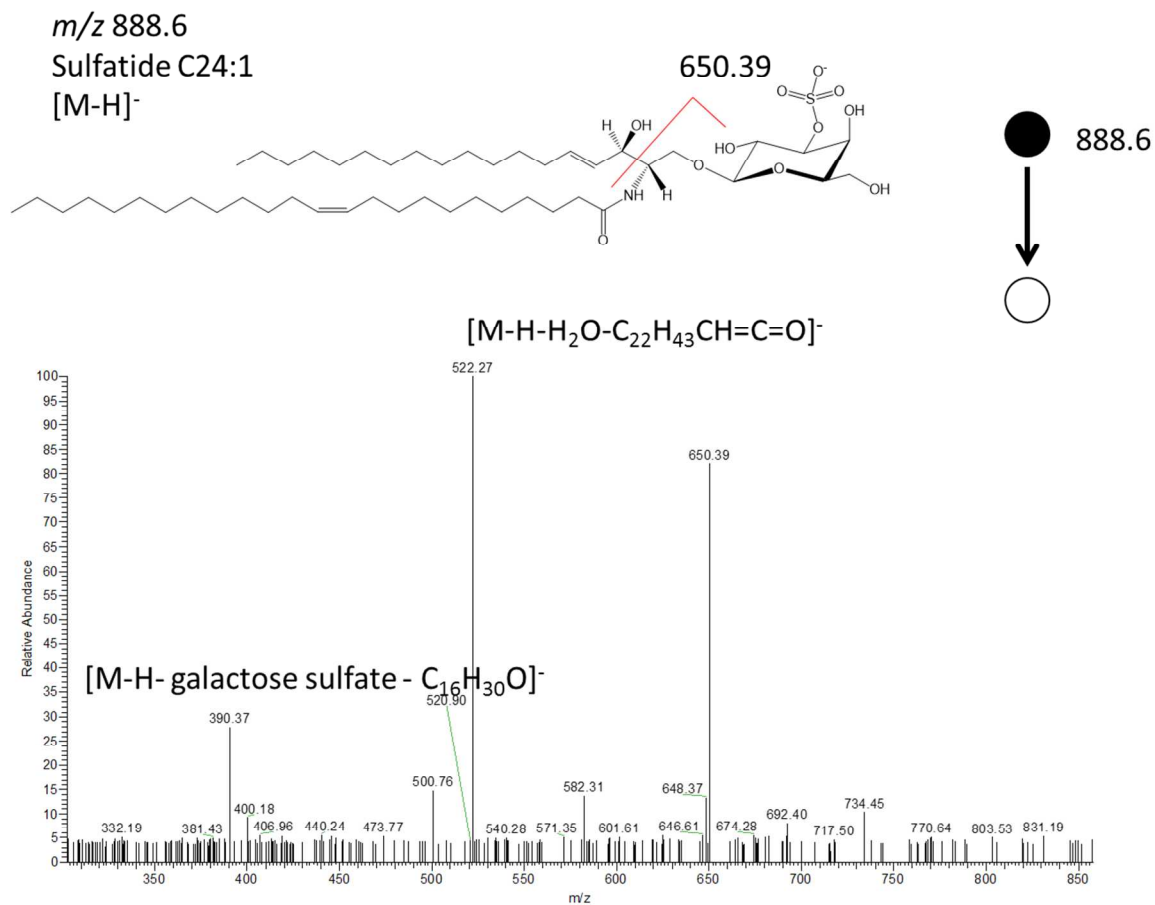

Figure S1. Negative ion mode tandem mass spectrometry analysis of the precursor ion at  $m/z$  888.6

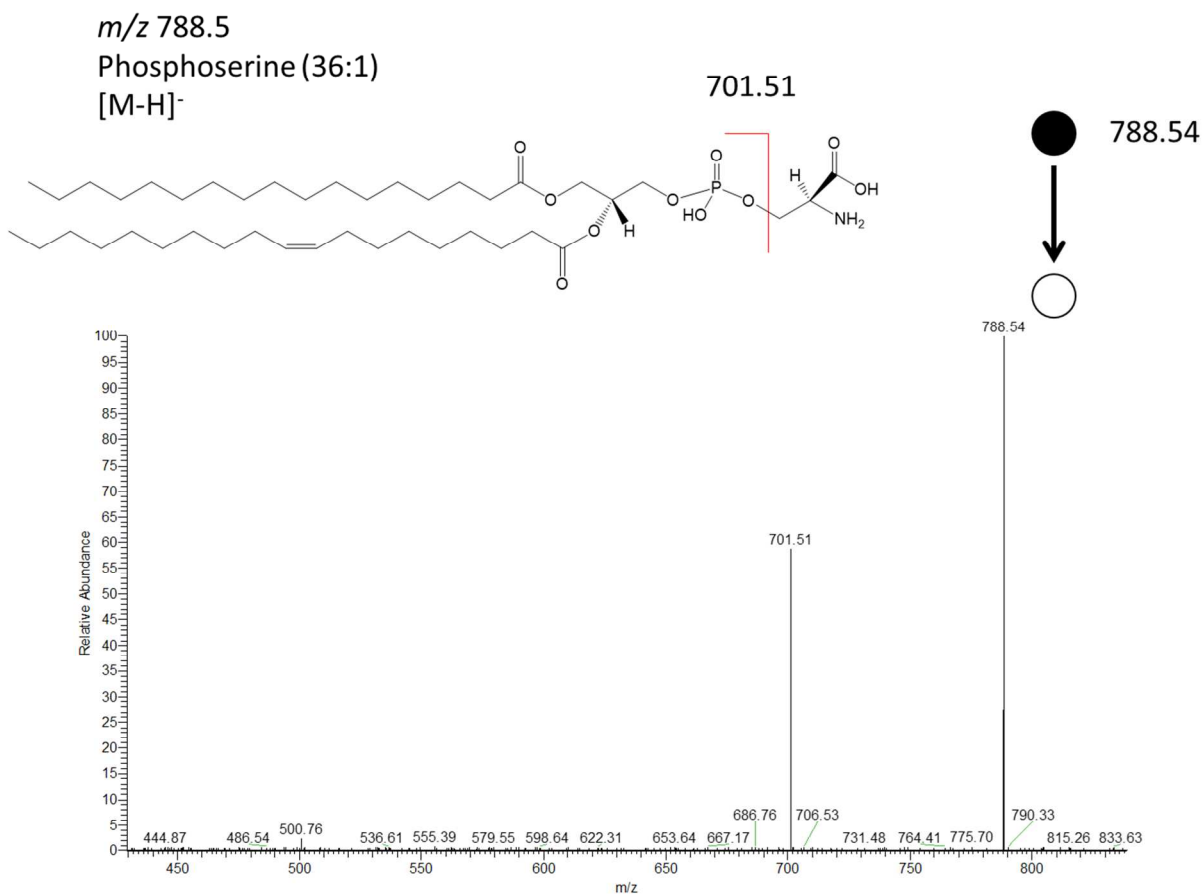

Figure S2. Negative ion mode tandem mass spectrometry analysis of the precursor ion at  $m/z$  788.54

$m/z$  885.6  
Phosphatidylinositol (38:4)  
[M-H]<sup>-</sup>

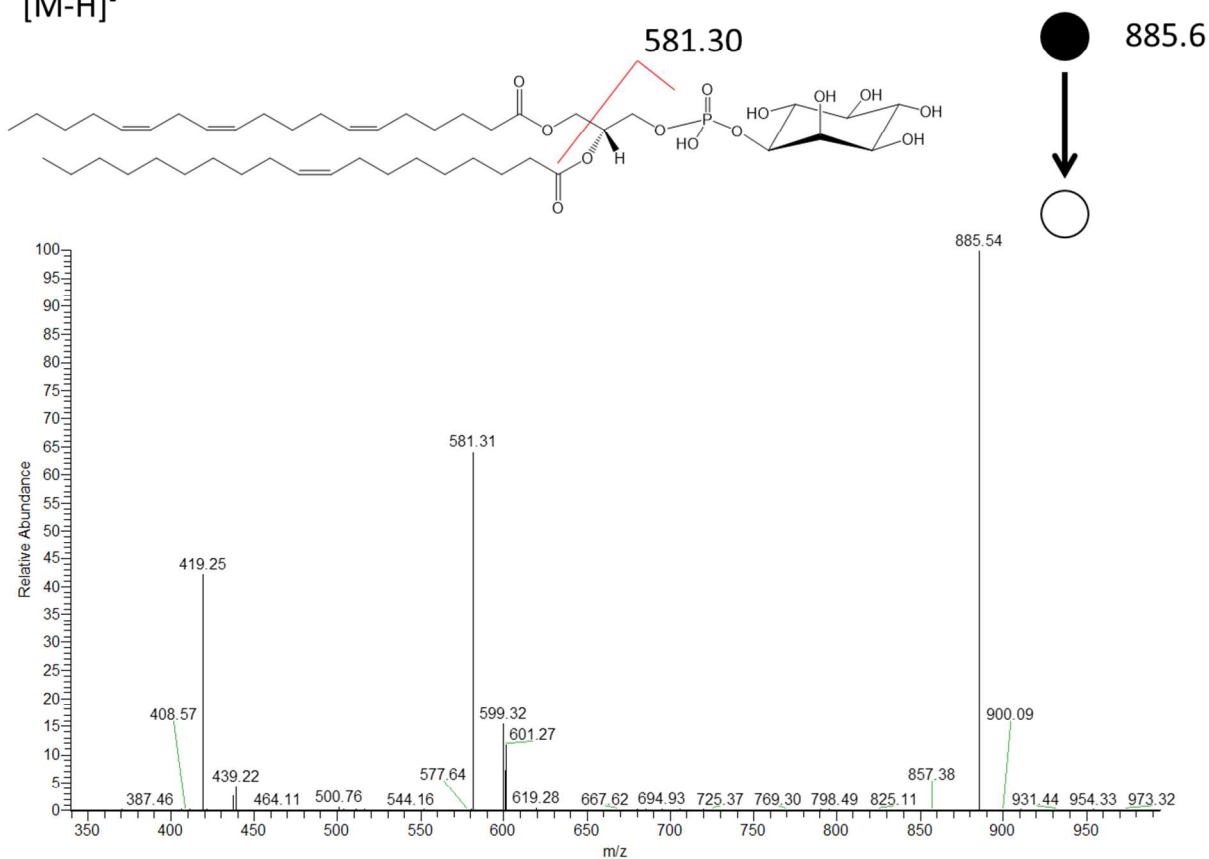

Figure S3. Negative ion mode tandem mass spectrometry analysis of the precursor ion at  $m/z$  885.6

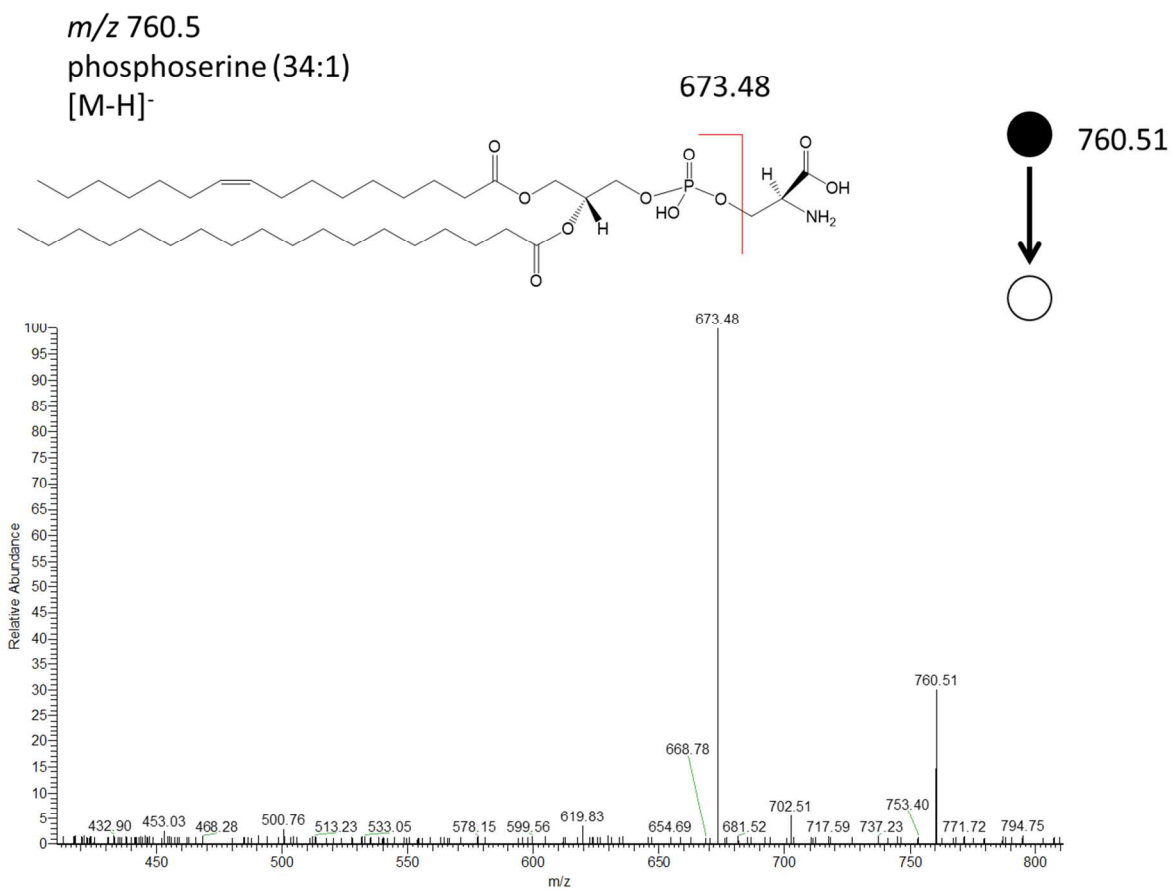

Figure S4. Negative ion mode tandem mass spectrometry analysis of the precursor ion at  $m/z$

760.51

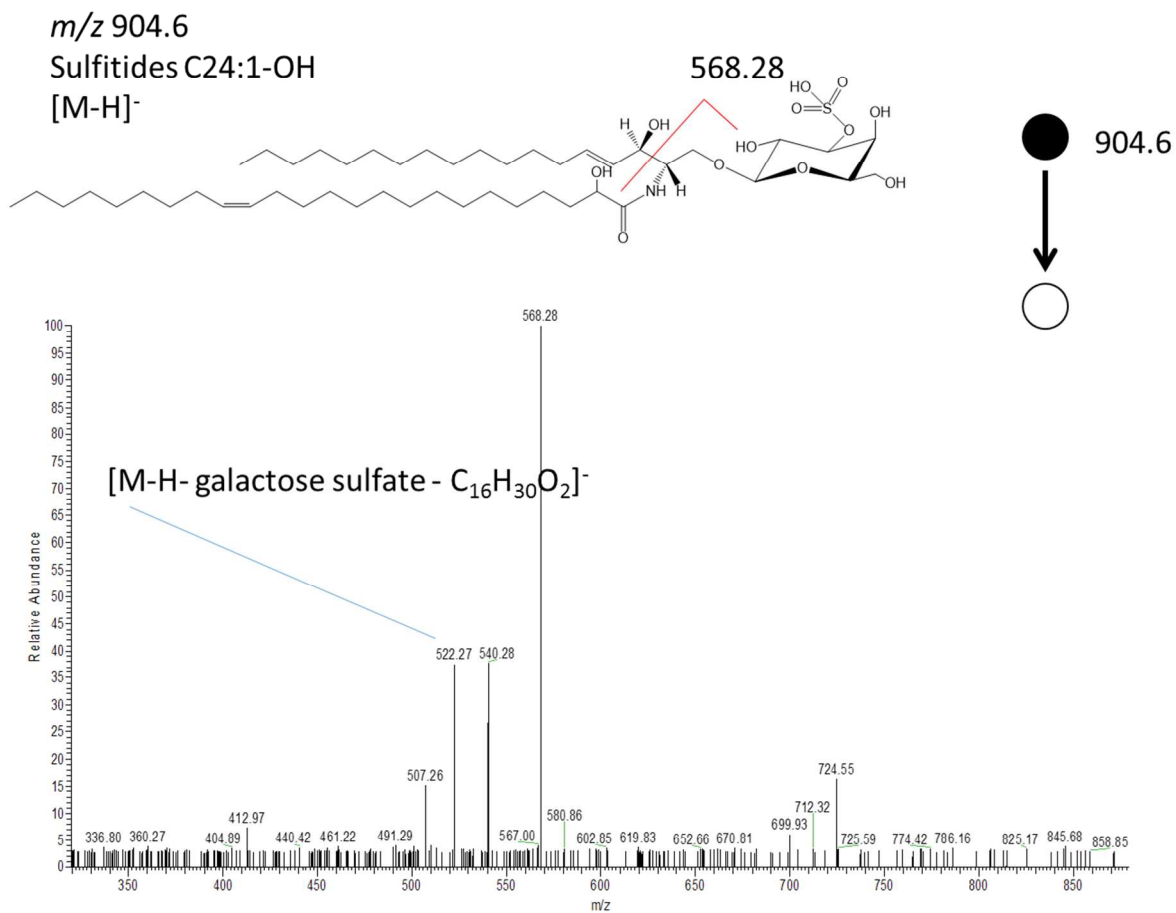

Figure S5. Negative ion mode tandem mass spectrometry analysis of the precursor ion at  $m/z$

904.6

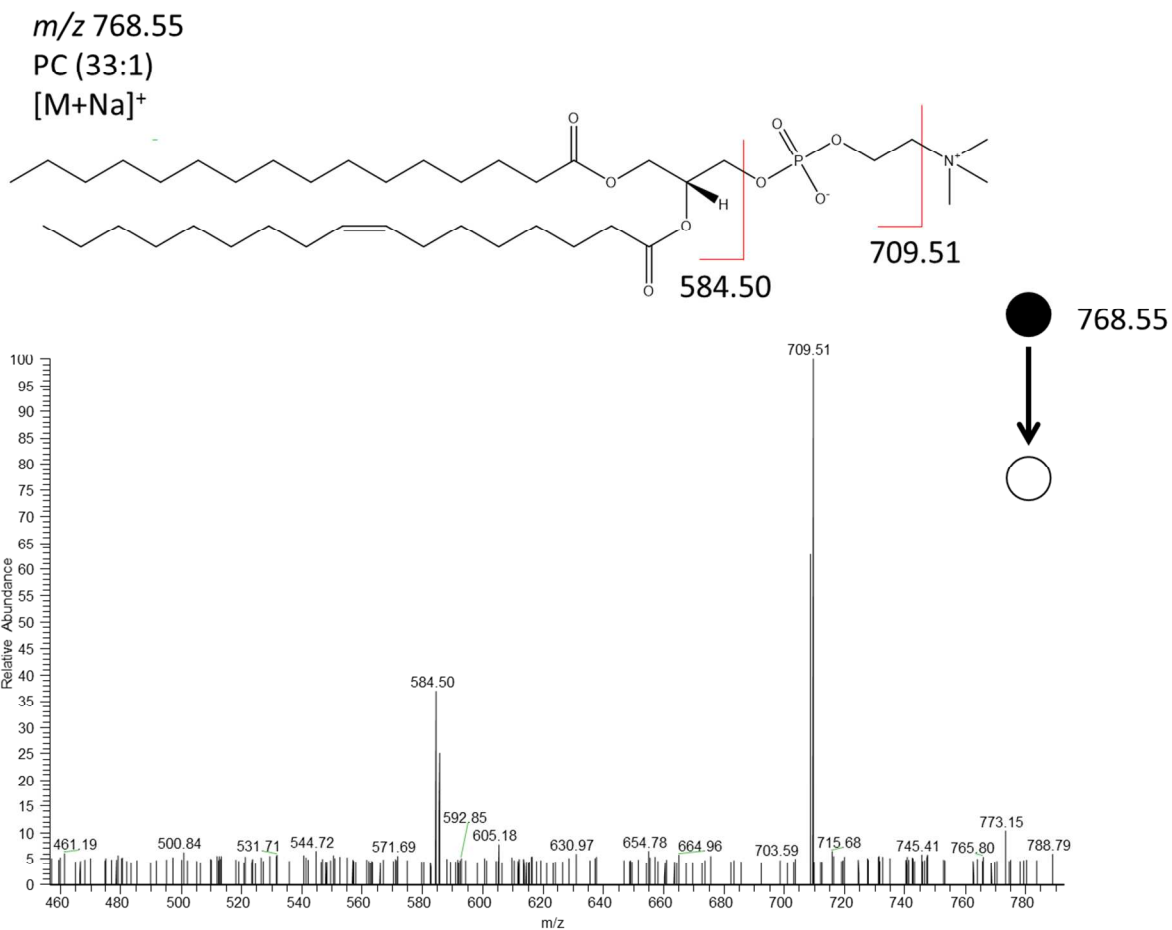

Figure S6. Positive ion mode tandem mass spectrometry analysis of the precursor ion at  $m/z$  768.55



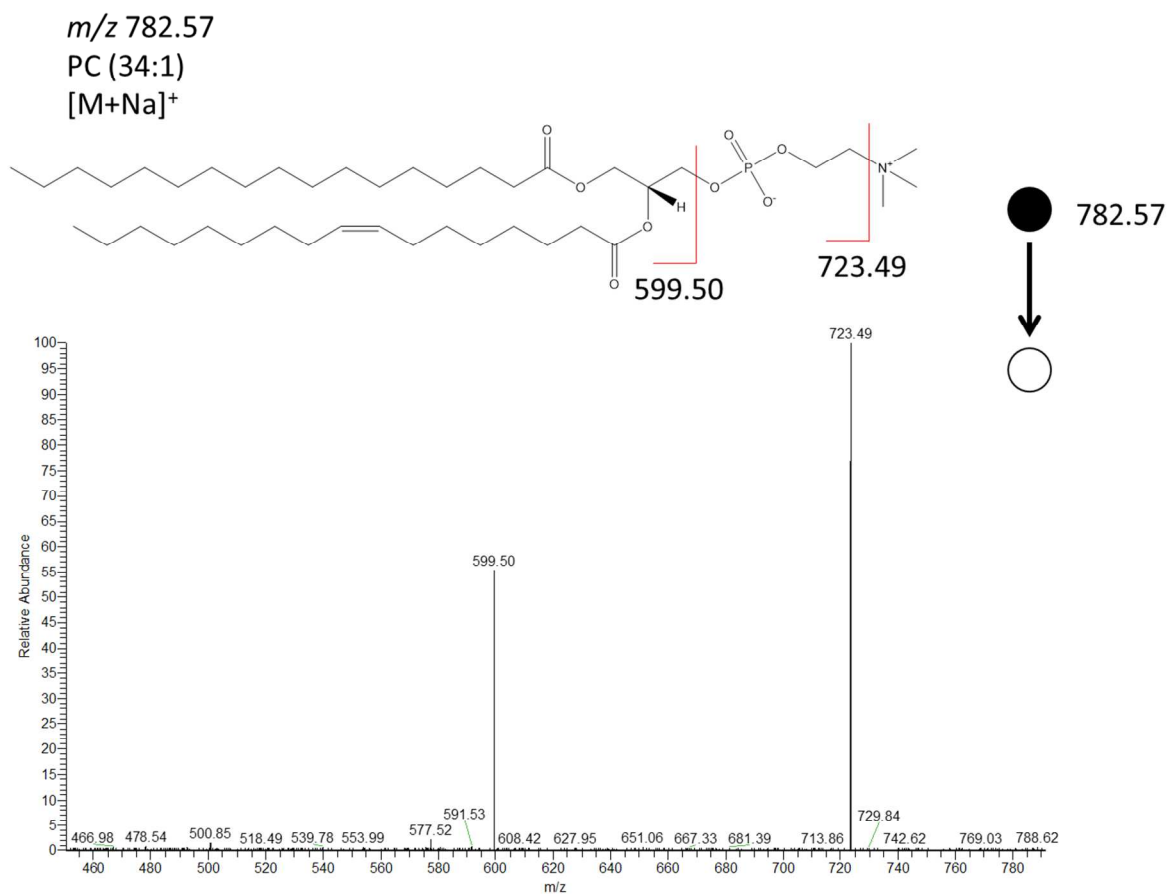

Figure S7. Positive ion mode tandem mass spectrometry analysis of the precursor ion at  $m/z$  782.57

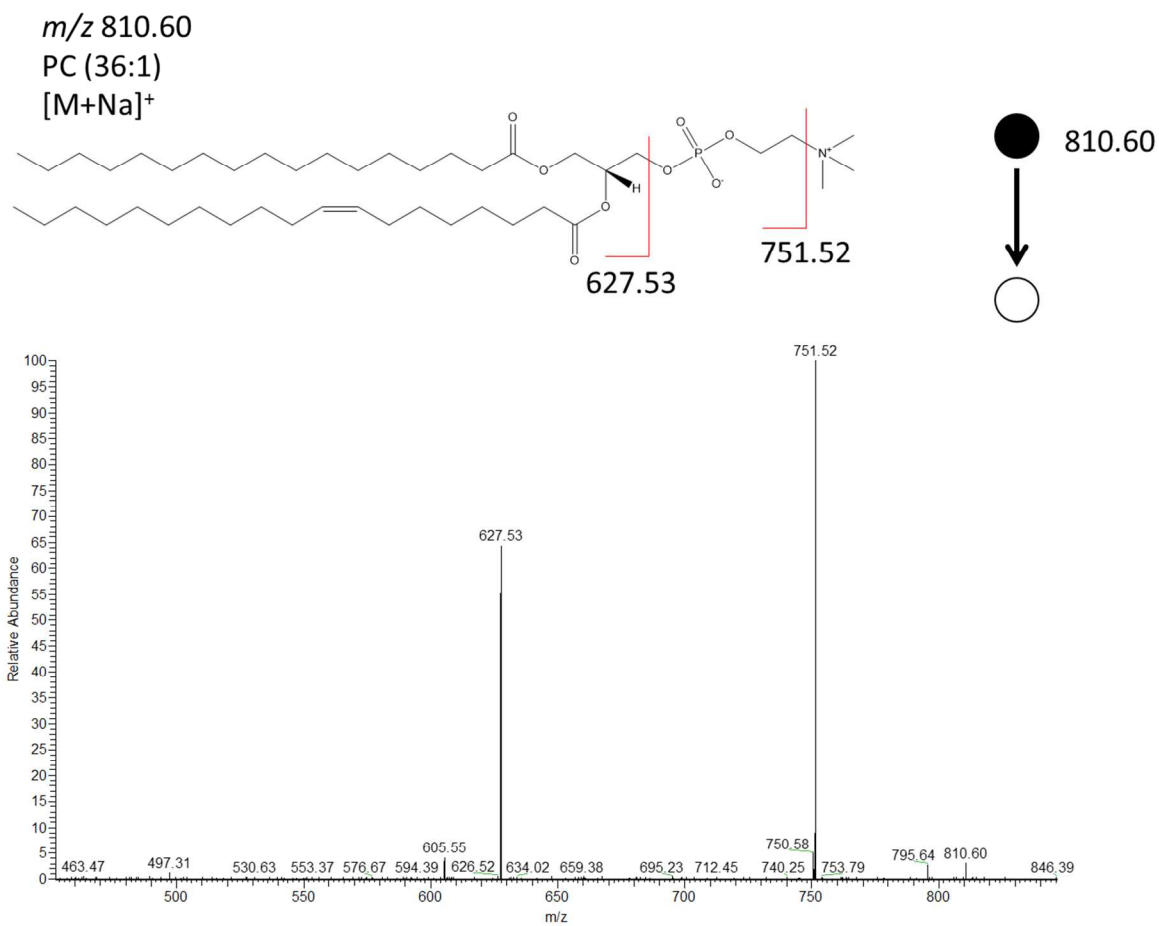

Figure S8. Positive ion mode tandem mass spectrometry analysis of the precursor ion at  $m/z$  810.60

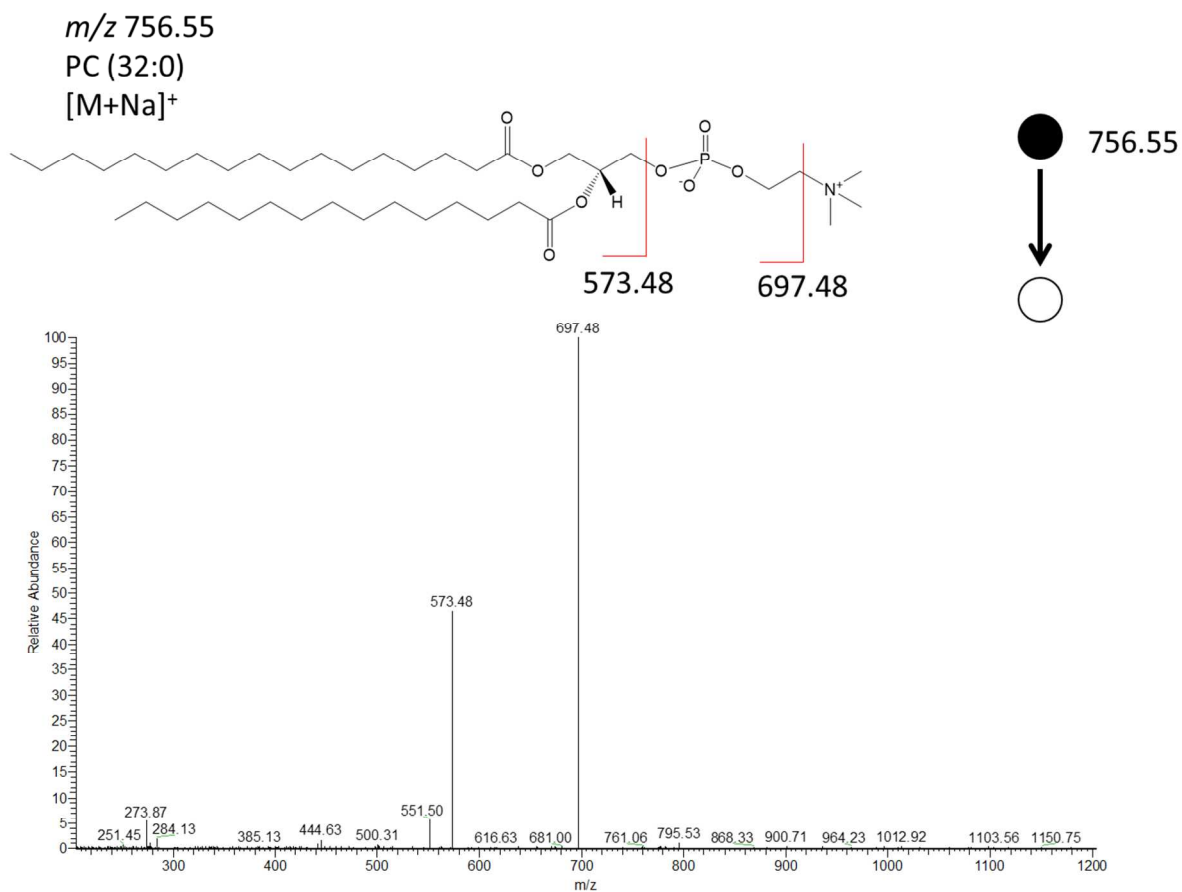

Figure S9. Positive ion mode tandem mass spectrometry analysis of the precursor ion at  $m/z$

756.55

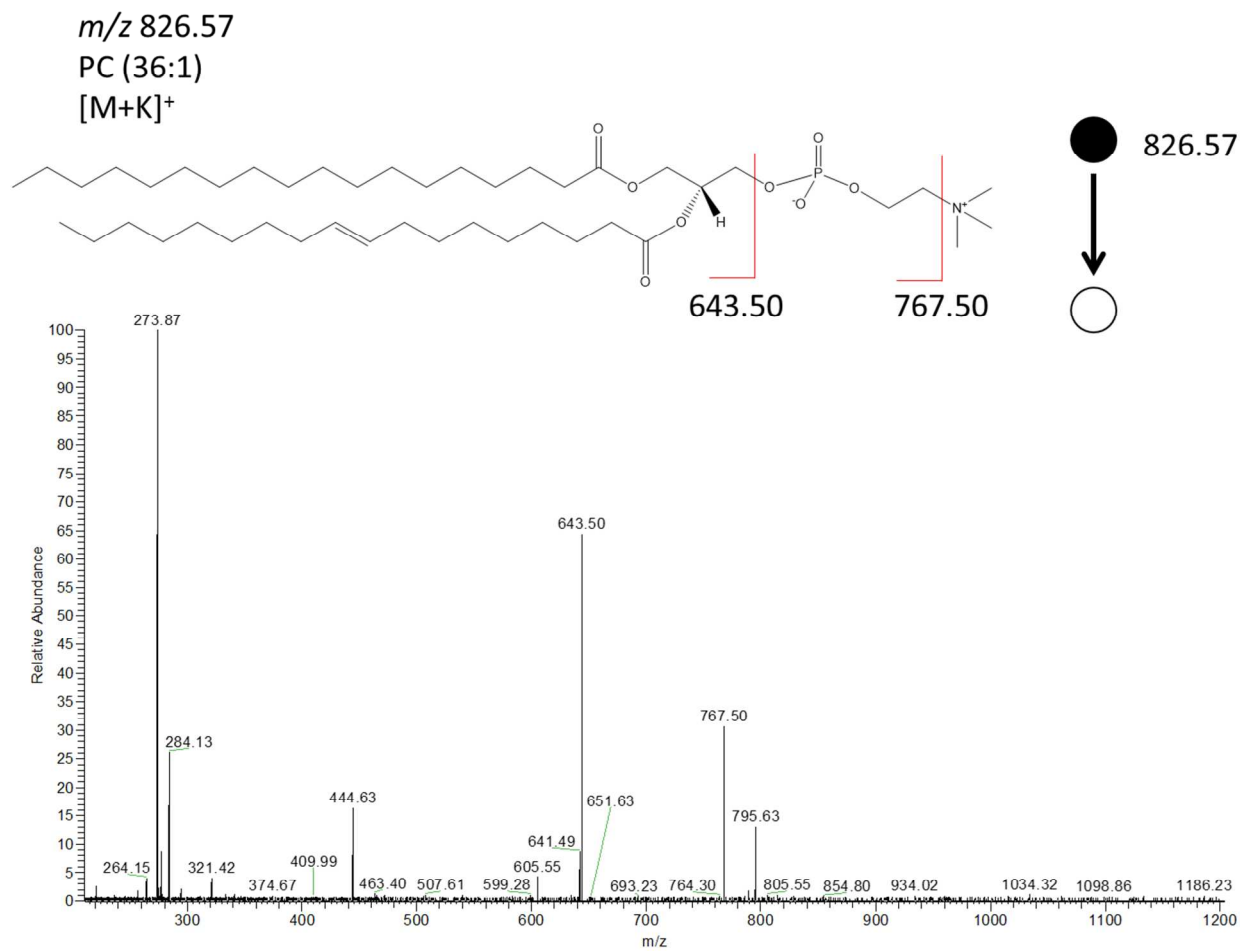

Figure S10. Positive ion mode tandem mass spectrometry analysis of the precursor ion at  $m/z$  826.57

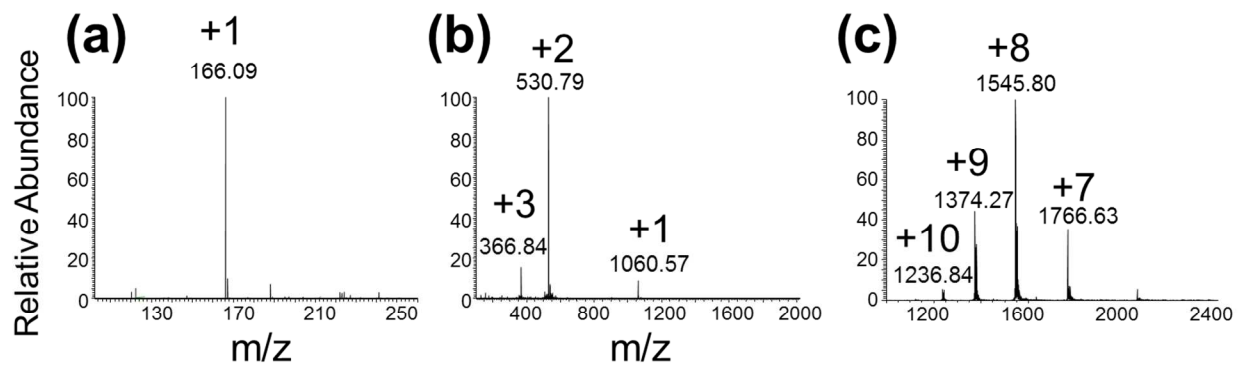

Figure S11. Mass spectra of the samples in liquid phase including (a) 100  $\mu$ M phenylalanine, (b) 100  $\mu$ M bradykinin, and (c) 100  $\mu$ M cytochrome *c*. The charge state of the ions is indicated by +z.

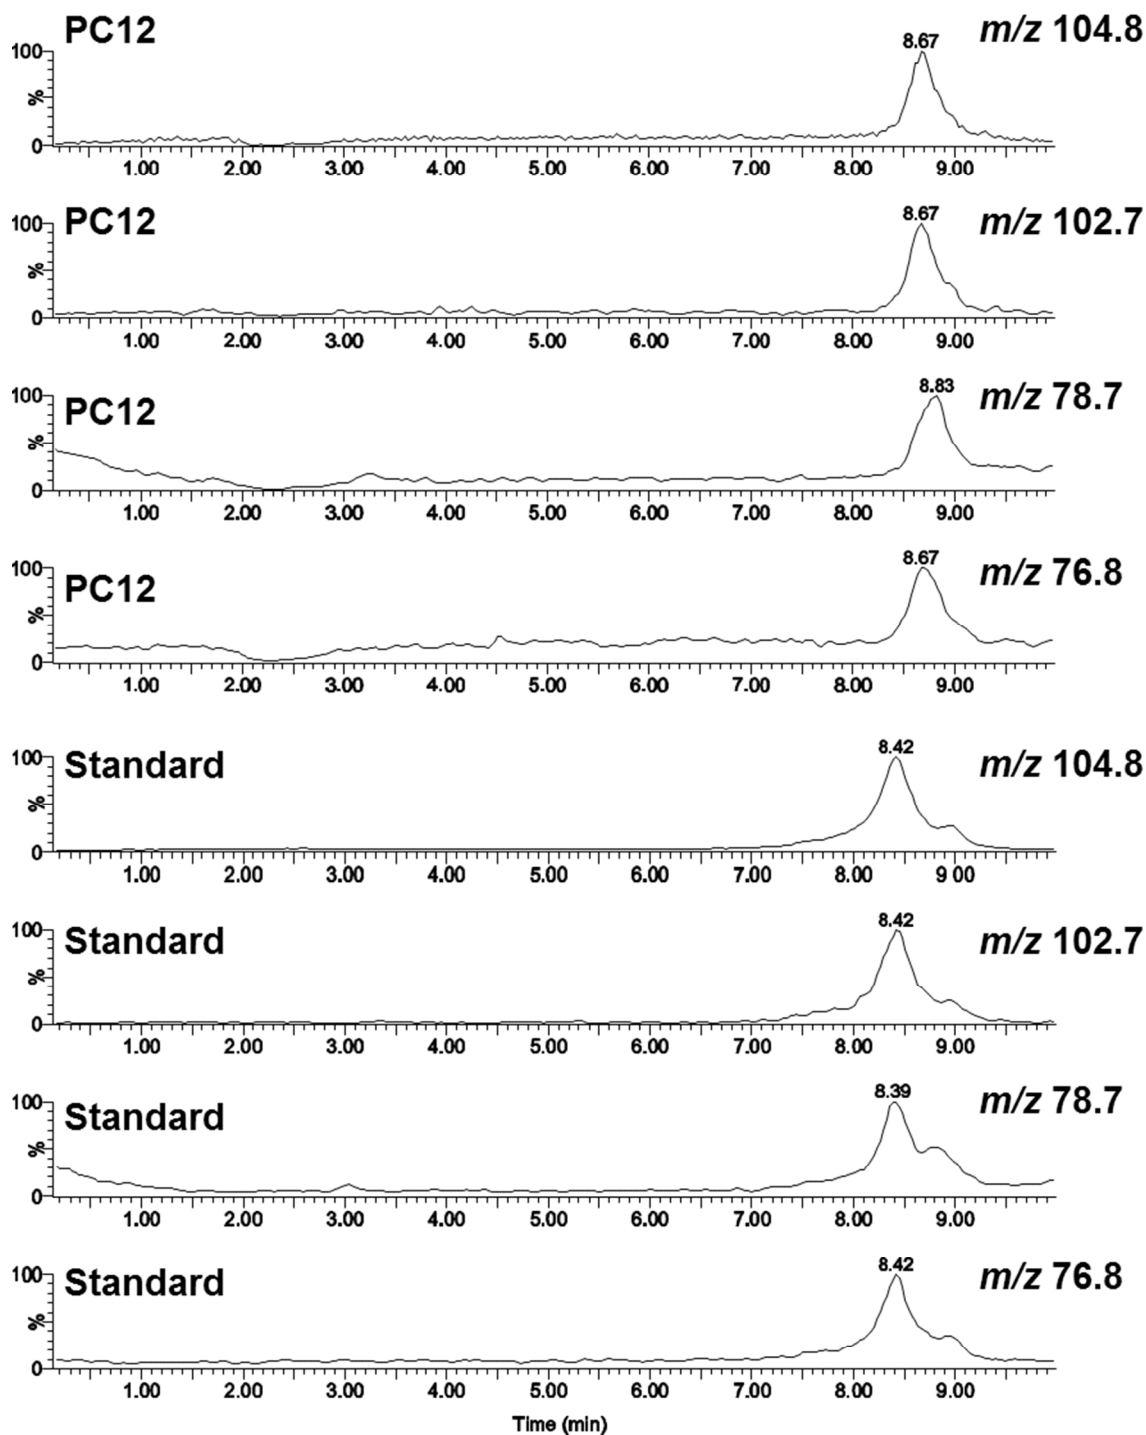

Figure S12. Multiple reaction monitoring LC-MS for phenethylamine showing a comparison of the biological sample with analytical standard sample (0.2  $\mu$ M phenethylamine). The matching of four unique fragments of phenethylamine ( $m/z$  122) at  $m/z$  104.8,  $m/z$  102.7,  $m/z$  78.7 and  $m/z$  76.8, between the releasates from PC12 cells and the analytical standard confirmed the identity of the releasate as phenethylamine.

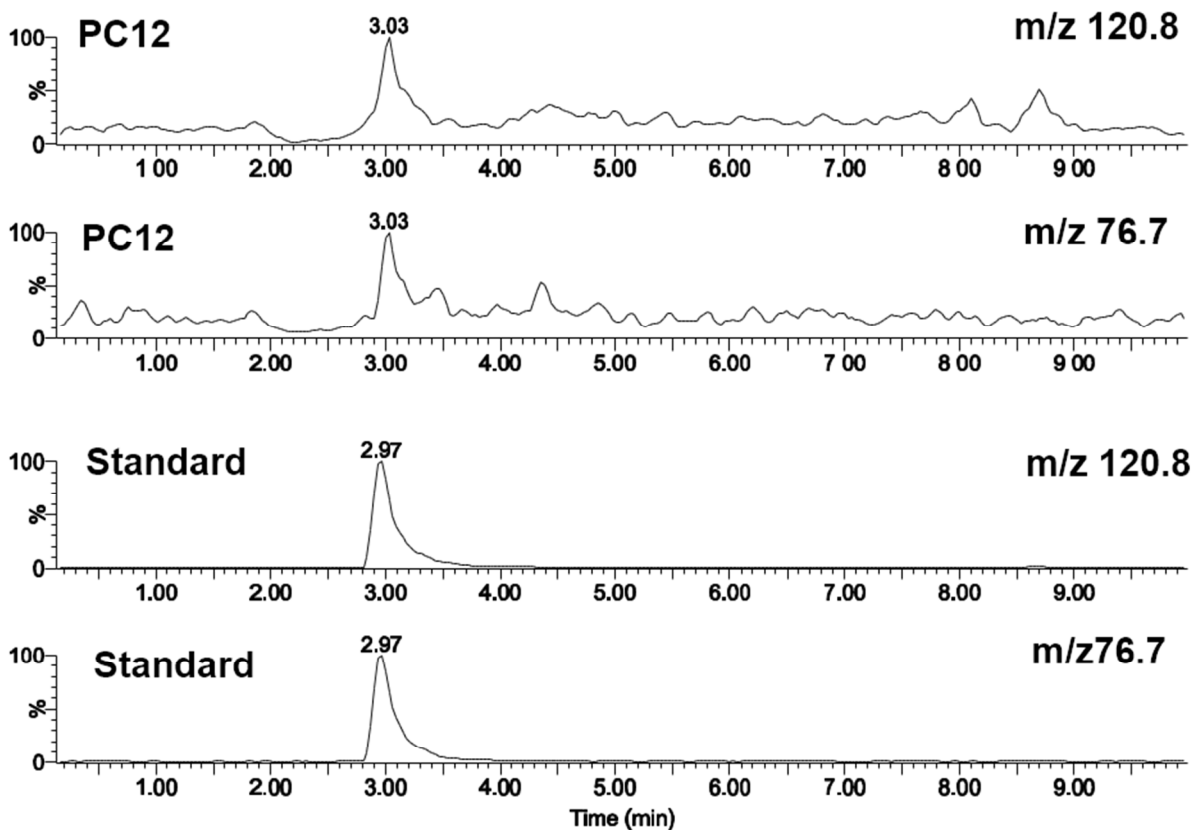

Figure S13. Multiple reaction monitoring LC–MS for tyramine showing a comparison of biological sample with analytical standard sample (0.2  $\mu$ M tyramine). The matching of two unique fragments from tyramine ( $m/z$  138) at  $m/z$  120.8 and  $m/z$  76.3, between the releases from PC12 cells and the analytical standard confirmed the identity of the releasate as tyramine.
